# Supplementary material for: TMPRSS4: A Novel Tumor Prognostic Indicator for the Stratification of Stage IA Tumors and a Liquid Biopsy Biomarker for NSCLC Patients
Source: PubMed Central journal article supplement (PMC6947244; doi:10.3390/jcm8122134), 2019-12-03
Supplement: jcm-08-02134-s001.pdf [file jcm-08-02134-s001.pdf]

Supplementary Materials

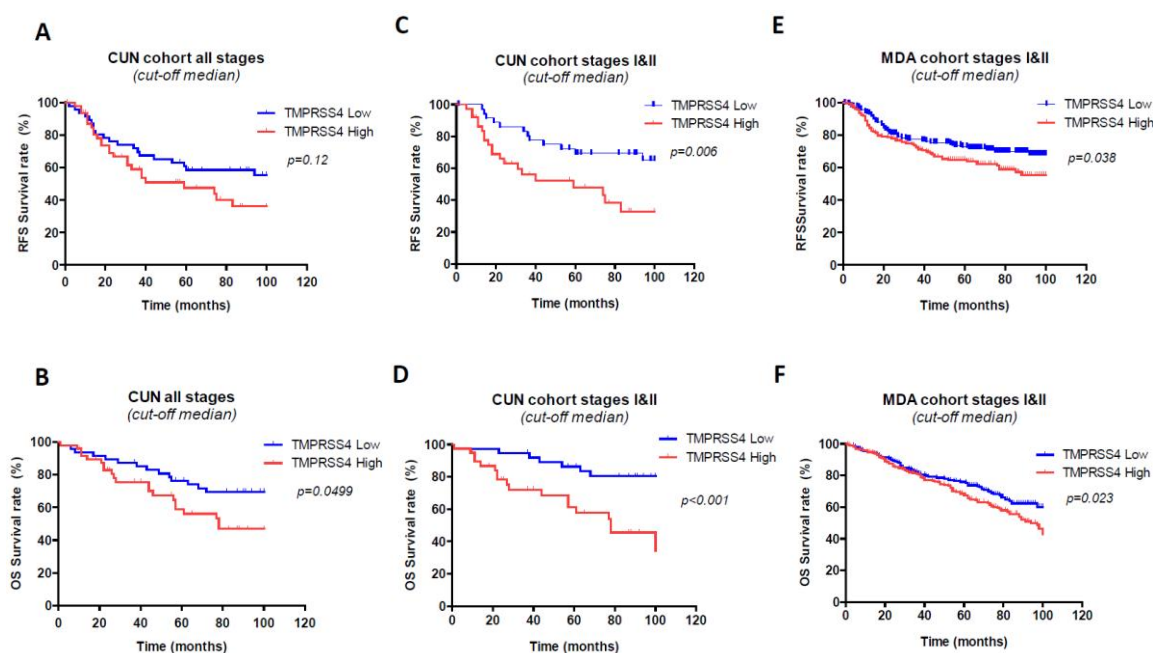

**Figure S1.** Prognostic value of TMPRSS4 including patients from all stages (I–IV) and early stages (I–II) in the CIMA-CUN cohort, and early stages (I–II) in the MDA cohort. RFS (A) and OS (B) in patients from CIMA-CUN stratified by the median value of TMPRSS4 protein expression. Differences between good/bad prognosis was clearly appreciated in stage I-II patients:  $p=0.006$  for RFS (C) and  $p<0.001$  for OS (D). RFS (E) and OS (F) for stages I-II from the MDA cohort stratified by the median.

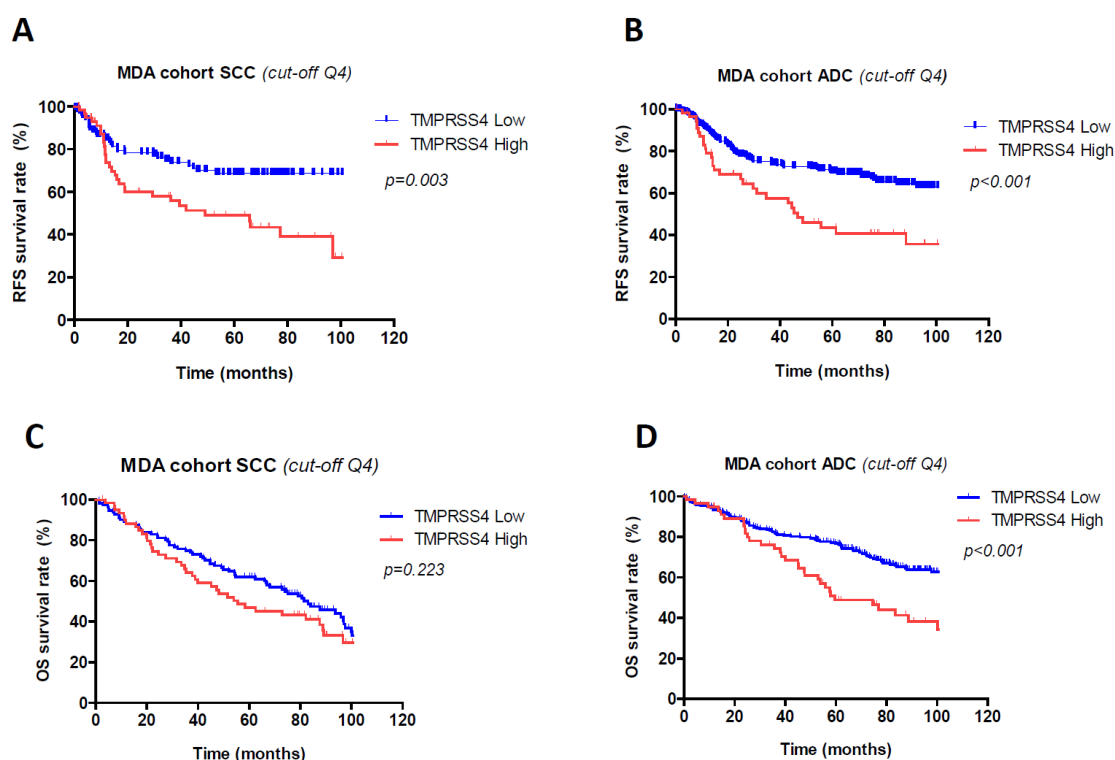

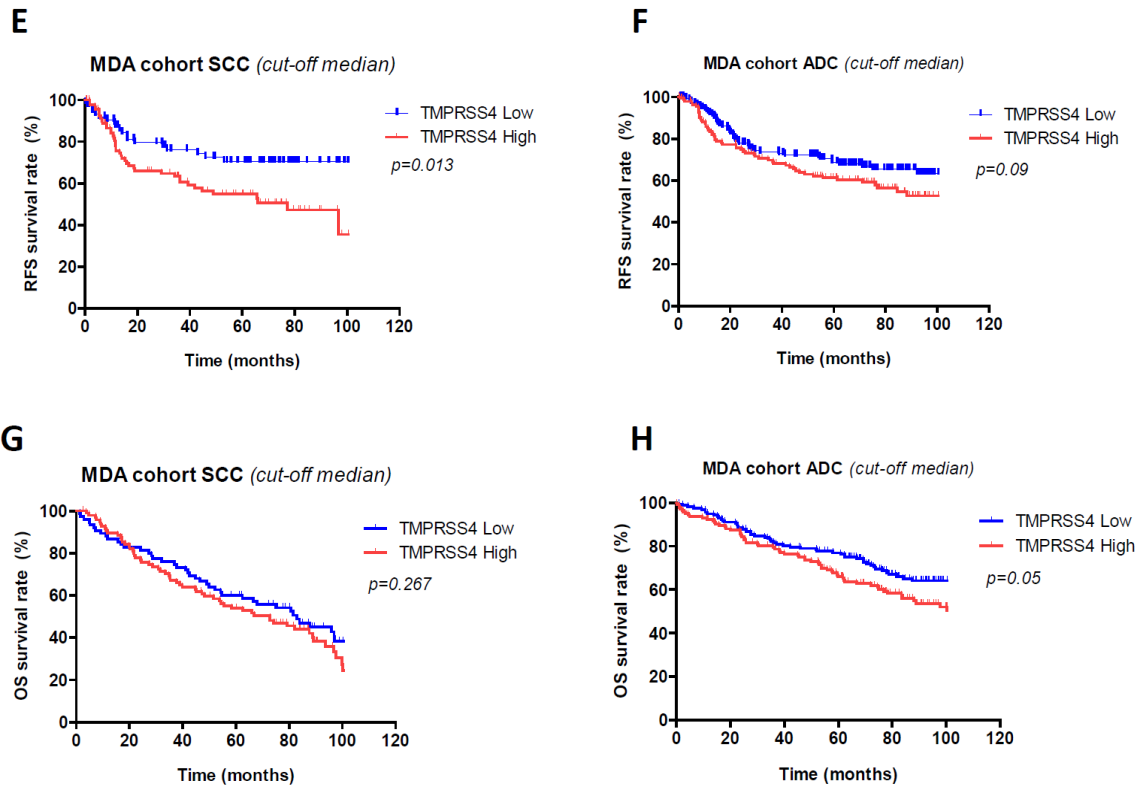

**Figure S2.** Prognostic value of TMPRSS4 from the MDA cohort in adenocarcinomas (ADC) or squamous cell carcinomas (SCC), considering all stages. In A-D, the top quartile (Q4) was considered as cut-off value. (A) RFS in SCC; (B) RFS in ADC; (C) OS in SCC; (D) OS in ADC. In E-H, the median was also evaluated as cut-off. (E) RFS in SCC; (F) RFS in ADC; (G) OS in SCC; (H) OS in ADC. Separation of the patients in high/low risk and p-values of the differences were improved when quartiles were considered for the stratification.

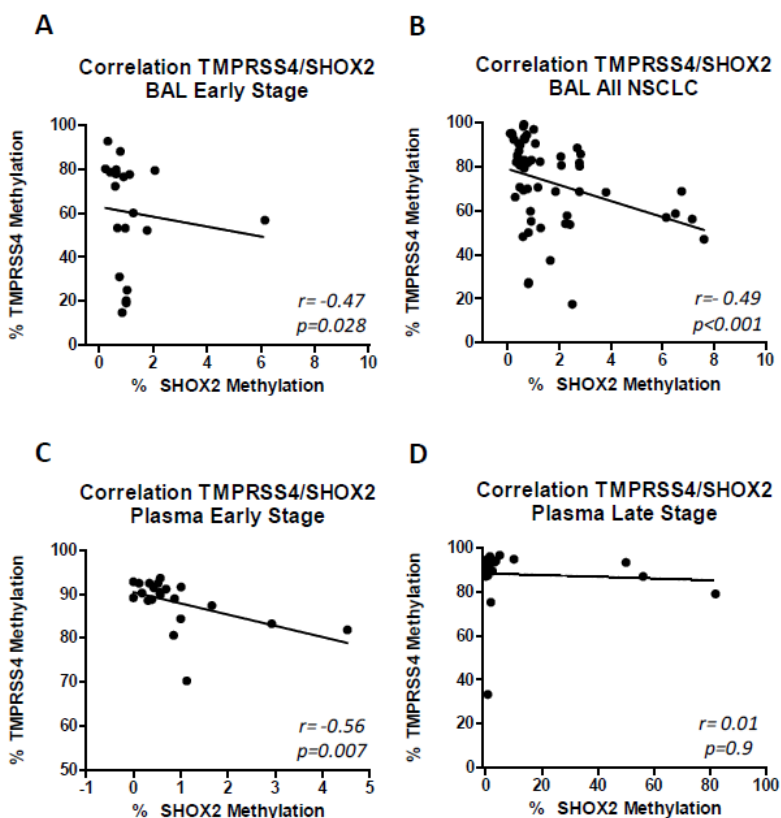

**Figure S3.** Inverse correlation between *TMPRSS4* methylation status and *SHOX2* methylation status in BAL (A,B) and plasma (C,D).

**Table S1.** Cohort of patients from Hospital General Universitario de Valencia (HGU) used to study the methylation status of *TMPRSS4* and *SHOX2* in tumors and matched non-malignant lung samples by ddPCR.

| HGUV cohort (n=59)      |              |
|-------------------------|--------------|
| <b>Age</b>              | <b>n (%)</b> |
| <65                     | 27 (45.8)    |
| ≥65                     | 32 (54.2)    |
| <b>Gender</b>           |              |
| Female                  | 1 (1.7)      |
| Male                    | 58 (98.3)    |
| <b>Smoking habit</b>    |              |
| Current                 | 30 (50.8)    |
| Former                  | 27 (45.8)    |
| Never                   | 2 (3.4)      |
| <b>Histology</b>        |              |
| SCC                     | 57 (96.6)    |
| Others                  | 2 (3.4)      |
| <b>Stage</b>            |              |
| I                       | 27 (45.8)    |
| II                      | 14 (23.7)    |
| III                     | 18 (30.5)    |
| <b>Adjuvant therapy</b> |              |
| No                      | 32 (54.2)    |
| Yes                     | 22 (37.3)    |
| NA *                    | 5 (8.5)      |

\*Not available; SCC: squamous cell carcinoma

**Table S2.** Cohort of patients used to quantify methylation status of the *TMPRSS4* and *SHOX2* promoters in bronchoalveolar lavages (BAL) from NSCLC patients.

| <b>BAL cohort (n=79)</b> |              |
|--------------------------|--------------|
| <b>Age</b>               | <b>n (%)</b> |
| <65                      | 51 (64.6)    |
| ≥65                      | 28 (35.4)    |
| <b>Gender</b>            |              |
| Female                   | 14 (17.7)    |
| Male                     | 65 (82.3)    |
| <b>Smoking status</b>    |              |
| Current                  | 21 (26.6)    |
| Former                   | 43 (54.4)    |
| Never                    | 14 (17.7)    |
| NA *                     | 1 (1.3)      |
| <b>Histology</b>         |              |
| ADC                      | 22 (27.8)    |
| SCC                      | 38 (48.1)    |
| Others                   | 16 (20.3)    |
| NA *                     | 3 (3.8)      |
| <b>Stage</b>             |              |
| I                        | 15 (19.0)    |
| II                       | 8 (10.0)     |
| III                      | 20 (25.4)    |
| IV                       | 18 (22.8)    |
| NA *                     | 18 (22.8)    |

\*Not available; ADC: adenocarcinoma; SCC: squamous cell carcinoma

**Table S3.** Cohort of patients used to quantify methylation status of the *TMPRSS4* and *SHOX2* promoters in plasmas from NSCLC patients.

| <b>Plasmas cohort (n=89)</b> |              |
|------------------------------|--------------|
| <b>Age</b>                   | <b>n (%)</b> |
| <65                          | 56 (62.9)    |
| ≥65                          | 33 (37.1)    |
| <b>Gender</b>                |              |
| Female                       | 23 (25.8)    |
| Men                          | 66 (74.2)    |
| <b>Smoking status</b>        |              |
| Current                      | 26 (29.3)    |
| Former                       | 48 (53.9)    |
| Never                        | 14 (15.7)    |
| NA*                          | 1 (1.1)      |
| <b>Histology</b>             |              |
| ADC                          | 51 (57.3)    |
| SCC                          | 38 (42.7)    |
| <b>Stage</b>                 |              |
| I                            | 8 (9.0)      |
| II                           | 8 (9.0)      |
| III                          | 19 (21.4)    |
| IV                           | 52 (58.4)    |
| NA*                          | 2 (2.2)      |

\*Not available; ADC: adenocarcinoma; SCC: squamous cell carcinoma

**Table S4.** Sequence of primers and probes for ddPCR analysis.

| Gene           | Sequence (5' - 3') bisulfite-treated DNA |                                                | Sequence (5' - 3') untreated DNA |                          |
|----------------|------------------------------------------|------------------------------------------------|----------------------------------|--------------------------|
| <i>TMPRSS4</i> | <b>Fw:</b>                               | GTTGGGTGGAAGTTATTTAG                           | <b>Fw:</b>                       | CCTGTTCTGAGGCCGAAG       |
|                | <b>Rev:</b>                              | ACTAAAACAACACCTAAAATC                          | <b>Rev:</b>                      | GTGTCTTGTAACCTGACACC     |
|                | <b>Probe Met (FAM):</b>                  | TGAGGT <u>CG</u> AAGGTTTTATG                   | <b>Probe (FAM):</b>              | ACTTCAGGTGTTGTTCCAGCC    |
|                | <b>Probe non-Met (HEX):</b>              | TGAGGT <u>TG</u> AAGGTTTTATG                   |                                  |                          |
| <i>SHOX2</i>   | <b>Fw:</b>                               | AGGTTTTTTGGATAGTTAGG                           | <b>Fw:</b>                       | AGGCGGAAAACCAGCCTC       |
|                | <b>Rev:</b>                              | ACCCTTTAAACAACCAAC                             | <b>Rev:</b>                      | TGCGTTTCCACGAGGGAG       |
|                | <b>Probe Met (FAM):</b>                  | <u>ACG</u> AGTATAGG <u>CG</u> TTT <u>ACG</u> T | <b>Probe (FAM):</b>              | CCGCTCTTTCTGTTCTCTCTTCGC |
|                | <b>Probe non-Met (HEX):</b>              | TAT <u>G</u> AGTATAGG <u>TG</u> TTTATGTTAT     |                                  |                          |

**Table S5.** Relationship between TMPRSS4 protein levels and clinicopathological characteristics of the patients from the MDA and CIMA-CUN cohorts. The median was used as cut-off value to define high vs. low expression.

| MDA Cohort (n=489)  |              |              |              | CIMA-CUN Cohort (n=95) |              |              |              |
|---------------------|--------------|--------------|--------------|------------------------|--------------|--------------|--------------|
|                     | TMP Low      | TMP High     | <i>p</i>     |                        | TMP Low      | TMP High     | <i>p</i>     |
| Age                 | <i>n</i> (%) | <i>n</i> (%) |              | Age                    | <i>n</i> (%) | <i>n</i> (%) |              |
| < 65                | 94 (52.2)    | 86 (47.8)    | 0.356        | < 65                   | 27 (57.4)    | 20 (42.6)    | 0.124        |
| ≥65                 | 148 (47.8)   | 161 (52.1)   |              | ≥65                    | 20 (41.7)    | 28 (58.3)    |              |
| Gender              |              |              |              | Gender                 |              |              |              |
| Female              | 111 (48.5)   | 118 (51.5)   | 0.673        | Female                 | 8 (61.5)     | 5 (38.5)     | 0.349        |
| Male                | 131 (50.4)   | 129 (49.6)   |              | Male                   | 39 (47.6)    | 43 (52.4)    |              |
| Smoking habits      |              |              |              | Smoking habits         |              |              |              |
| Current             | 69 (41.3)    | 98 (58.7)    | <b>0.029</b> | Current                | 9 (42.9)     | 12 (57.1)    | 0.787        |
| Former              | 139 (54.5)   | 116 (45.5)   |              | Former                 | 34 (51.5)    | 32 (48.5)    |              |
| Never               | 34 (50.7)    | 33 (49.3)    |              | Never                  | 4 (50.0)     | 4 (50.0)     |              |
| Histology           |              |              |              | Histology              |              |              |              |
| ADC                 | 157 (52.5)   | 142 (47.5)   | 0.189        | ADC                    | 29 (64.4)    | 16 (35.5)    | <b>0.019</b> |
| SCC                 | 75 (43.9)    | 96 (56.1)    |              | SCC                    | 17 (37.0)    | 29 (63.0)    |              |
| Other               | 10 (52.6)    | 9 (47.4)     |              | Other                  | 1 (25.0)     | 3 (75.0)     |              |
| Stage (8th Edition) |              |              |              | Stage (8th Edition)    |              |              |              |
| I                   | 148 (52.5)   | 134 (47.5)   | 0.245        | I                      | 23 (52.3)    | 21 (47.7)    | 0.459        |
| II                  | 48 (45.3)    | 58 (54.7)    |              | II                     | 14 (45.2)    | 17 (54.8)    |              |
| III                 | 40 (43.5)    | 52 (56.5)    |              | III                    | 8 (44.4)     | 10 (55.6)    |              |
| IV                  | 6 (66.7)     | 3 (33.3)     |              | IV                     | 2 (100.0)    | 0 (0.0)      |              |
| Adjuvant therapy    |              |              |              | Adjuvant therapy       |              |              |              |
| No                  | 157 (49.5)   | 160 (50.5)   | 0.992        | No                     | 27 (50.0)    | 27 (50.0)    | 0.906        |
| Yes                 | 59 (49.6)    | 60 (50.4)    |              | Yes                    | 20 (48.8)    | 21 (51.2)    |              |

ADC: adenocarcinoma; SCC: squamous cell carcinoma.

**Table S6.** Relationship between TMPRSS4 protein levels and clinicopathological characteristics of the patients from the MDA cohort. The top quartile was used as cut-off value to define high vs. low expression.

| <b>MDA Cohort (n = 489)</b> |                |                 |                  |
|-----------------------------|----------------|-----------------|------------------|
|                             | <b>TMP Low</b> | <b>TMP High</b> | <b>p</b>         |
| <b>Age</b>                  | <b>n (%)</b>   | <b>n (%)</b>    |                  |
| < 65                        | 132 (73.3)     | 48 (26.7)       | 0.503            |
| ≥65                         | 235 (76.1)     | 74 (23.9)       |                  |
| <b>Gender</b>               |                |                 |                  |
| Female                      | 184 (70.8)     | 76 (29.2)       | <b>0.02</b>      |
| Male                        | 183 (79.9)     | 46 (20.1)       |                  |
| <b>Smoking habits</b>       |                |                 |                  |
| Current                     | 56 (83.6)      | 11 (16.4)       | <b>0.009</b>     |
| Former                      | 119 (78.0)     | 56 (22.0)       |                  |
| Never                       | 44 (93.6)      | 3 (6.4)         |                  |
| <b>Histology</b>            |                |                 |                  |
| ADC                         | 243 (81.3)     | 56 (18.7)       | <b>&lt;0.001</b> |
| SCC                         | 111 (64.9)     | 60 (35.1)       |                  |
| Other                       | 13 (68.4)      | 6 (31.6)        |                  |
| <b>Stage (8th Edition)</b>  |                |                 |                  |
| I                           | 229 (81.2)     | 53 (18.8)       | <b>0.001</b>     |
| II                          | 72 (67.9)      | 34 (32.1)       |                  |
| III                         | 58 (63.0)      | 34 (37.0)       |                  |
| IV                          | 8 (88.9)       | 1 (11.1)        |                  |
| <b>Adjuvant therapy</b>     |                |                 |                  |
| No                          | 247 (77.9)     | 77 (22.1)       | 0.474            |
| Yes                         | 82 (68.9)      | 37 (31.1)       |                  |

ADC: adenocarcinoma; SCC: squamous cell carcinoma.

**Table S7.** Univariable Cox proportional hazards analysis of TMPRSS4 protein expression and RFS or OS in the MDA cohort. Dichotomization of TMPRSS4 expression was based on quartiles (considering the top 25%, Q4 as high). TMPRSS4 was found to be an independent prognostic factor for both RFS and OS. For the multivariable analysis, only variables whose p value was  $\leq 0.1$  were considered.

| MDA Cohort (n=489)         |      |             |        |      |             |        |
|----------------------------|------|-------------|--------|------|-------------|--------|
|                            | RFS  |             |        | OS   |             |        |
|                            | HR   | 95% CI      | p      | HR   | 95% CI      | p      |
| <b>Age</b>                 |      |             |        |      |             |        |
| < 65                       | 1    |             |        | 1    |             |        |
| $\geq 65$                  | 0.88 | (0.65-1.2)  | 0.456  | 1.61 | (1.21-2.16) | <0.001 |
| <b>Gender</b>              |      |             |        |      |             |        |
| Female                     | 1    |             |        | 1    |             |        |
| Male                       | 0.94 | (0.70-1.28) | 0.727  | 0.65 | (0.50-0.86) | 0.002  |
| <b>Smoking habits</b>      |      |             |        |      |             |        |
| Never                      | 1    |             |        | 1    |             |        |
| Former                     | 1.48 | (0.88-2.50) | 0.133  | 1.76 | (1.09-2.86) | 0.021  |
| Current                    | 1.82 | (1.06-3.12) | 0.028  | 2    | (1.21-3.31) | 0.006  |
| <b>Histology</b>           |      |             |        |      |             |        |
| ADC                        | 1    |             |        | 1    |             |        |
| SCC                        | 1.17 | (0.85-1.62) | 0.308  | 1.77 | (1.35-2.32) | <0.001 |
| Other                      | 1.13 | (0.5-2.59)  | 0.755  | 1.72 | (0.90-3.3)  | 0.098  |
| <b>Stage (8th Edition)</b> |      |             |        |      |             |        |
| I                          | 1    |             |        | 1    |             |        |
| II                         | 1.99 | (1.35-2.84) | <0.001 | 2.32 | (1.69-3.17) | <0.001 |
| III-IV                     | 2.81 | (1.96-4.02) | <0.001 | 2.59 | (1.88-3.56) | <0.001 |
| <b>Adjuvant therapy</b>    |      |             |        |      |             |        |
| No                         | 1    |             |        | 1    |             |        |
| Yes                        | 1.35 | (0.96-1.90) | 0.082  | 1.1  | (0.80-1.5)  | 0.55   |
| <b>TMPRSS4</b>             |      |             |        |      |             |        |
| Low                        | 1    |             |        | 1    |             |        |
| High                       | 2.09 | (1.53-2.87) | <0.001 | 1.82 | (1.38-2.41) | <0.001 |

**Table S8.** Clinicopathological characteristics of stage IA/IB NSCLC patients from the MDA cohort that were used to study the prognostic value of TMPRSS4.

| MDA Cohort Stage I (n = 282) |            |
|------------------------------|------------|
| Age                          | n (%)      |
| <65                          | 101 (35.8) |
| $\geq 65$                    | 181 (64.2) |
| <b>Gender</b>                |            |
| Female                       | 143 (50.7) |
| Male                         | 181 (49.3) |
| <b>Smoking habit</b>         |            |
| Current                      | 91 (32.3)  |
| Former                       | 142 (50.4) |
| Never                        | 46 (16.3)  |
| <b>Histology</b>             |            |
| ADC                          | 188 (66.7) |
| SCC                          | 84 (29.8)  |
| Other                        | 10 (3.5)   |
| <b>Stage (8th Edition)</b>   |            |
| IA1                          | 100 (35.5) |
| IA2                          | 14 (4.9)   |
| IA3                          | 73 (25.9)  |
| IB                           | 95 (33.7)  |
| <b>Adjuvant therapy</b>      |            |
| No                           | 230 (81.6) |
| Yes                          | 23 (8.2)   |
| NA *                         | 29 (10.2)  |

\* Not available; ADC: adenocarcinoma; SCC: squamous cell carcinoma.
